# Supplementary material for: Origin of a folded repeat protein from an intrinsically disordered ancestor
Source: eLife journal article supplement (doi:10.7554/elife.16761), 2016-09-13
Supplement: supp [file elife_poa_e16761_Supplementary_File_1.pdf › elife_poa_e16761_Supplementary_File_1.pdf]

# Origin of a folded repeat protein from an intrinsically disordered ancestor

## Supplementary file 1

Hongbo Zhu<sup>□</sup>, Edgardo Sepulveda, Marcus D. Hartmann, Manjunatha Kogenaru<sup>†</sup>,  
Astrid Ursinus, Eva Sulz, Reinhard Albrecht, Murray Coles, Jörg Martin, Andrei N. Lupas<sup>§</sup>

---

Department of Protein Evolution,  
Max Planck Institute for Developmental Biology,  
Spemannstr. 35, D-72076 Tübingen, Germany

---

□ hongbo.zhu@tuebingen.mpg.de

† present address: department of life sciences, imperial college london, london sw7 2az,  
united kingdom. E-mail: m.kogenaru@imperial.ac.uk

§ andrei.lupas@tuebingen.mpg.de; corresponding author

## Section A

**Table S1.** Amino acid variation in RPS20-hh at positions 6, 7, 9 and 23 (TPR repeat unit numbering). The statistics is based on the representative proteomes rp75 sequences (972 sequences) from Pfam family *Ribosomal\_S20p*. If an amino acid is not observed in the position, it is marked *NA*. Pfam 27.0 was used.

| Pos\AA    | - | A   | C  | D  | E   | F  | G  | H  | I  | K   | L   | M  | N  | P  | Q  | R   | S  | T  | V  | W  | Y  |
|-----------|---|-----|----|----|-----|----|----|----|----|-----|-----|----|----|----|----|-----|----|----|----|----|----|
| <b>6</b>  | 4 | 1   | NA | 1  | NA  | NA | NA | NA | NA | 686 | NA  | NA | 2  | NA | NA | 272 | 4  | 2  | NA | NA | NA |
| <b>7</b>  | 2 | 114 | NA | 10 | 7   | 1  | 14 | 8  | 5  | 533 | 3   | 1  | 65 | NA | 31 | 118 | 30 | 20 | 10 | NA | NA |
| <b>9</b>  | 2 | 8   | NA | 31 | 236 | 23 | NA | 15 | 57 | 61  | 99  | 6  | 32 | NA | 22 | 263 | 4  | 3  | 55 | NA | 55 |
| <b>23</b> | 5 | 471 | 2  | 6  | 19  | 18 | 6  | 2  | 19 | 25  | 224 | 10 | 13 | 1  | 31 | 18  | 26 | 22 | 42 | 2  | 10 |

## Section B

**Table S2.** Most commonly observed residues at the 34 columns of RPS20 that correspond to the TPR repeat unit. The statistics is based on the representative proteomes rp75 sequences (972 sequences) from Pfam 27.0 family *Ribosomal\_S20p*.

| Position | 1st            | 2nd            | 3rd            | KR    | CDEHKQNRSTWY |
|----------|----------------|----------------|----------------|-------|--------------|
| 1        | L (300, 30.9%) | M (225, 23.1%) | V (202, 20.8%) | 0.0%  | 0.0%         |
| 2        | R (640, 65.8%) | K (303, 31.2%) | H ( 10, 1.0%)  | 97.0% | 98.0%        |
| 3        | T (790, 81.3%) | N ( 95, 9.8%)  | S ( 32, 3.3%)  | 0.0%  | 94.3%        |
| 4        | A (389, 40.0%) | F (166, 17.1%) | Y (124, 12.8%) | 0.0%  | 12.8%        |
| 5        | I (449, 46.2%) | V (293, 30.1%) | L ( 70, 7.2%)  | 0.0%  | 0.0%         |
| 6        | K (686, 70.6%) | R (272, 28.0%) | S ( 4, 0.4%)   | 98.6% | 99.0%        |
| 7        | K (533, 54.8%) | R (118, 12.1%) | A (114, 11.7%) | 67.0% | 67.0%        |
| 8        | V (465, 47.8%) | F (230, 23.7%) | L ( 78, 8.0%)  | 0.0%  | 0.0%         |
| 9        | R (263, 27.1%) | E (236, 24.3%) | L ( 99, 10.2%) | 27.1% | 51.3%        |
| 10       | E (239, 24.6%) | A (239, 24.6%) | K (179, 18.4%) | 18.4% | 43.0%        |
| 11       | A (748, 77.0%) | L ( 50, 5.1%)  | S ( 29, 3.0%)  | 0.0%  | 3.0%         |
| 12       | I (362, 37.2%) | V (276, 28.4%) | L (127, 13.1%) | 0.0%  | 0.0%         |
| 13       | A (299, 30.8%) | E (241, 24.8%) | D ( 85, 8.7%)  | 0.0%  | 33.5%        |
| 14       | A (396, 40.7%) | S (155, 15.9%) | T ( 84, 8.6%)  | 0.0%  | 24.6%        |
| 15       | G (569, 58.5%) | K (103, 10.6%) | N ( 86, 8.8%)  | 10.6% | 19.4%        |
| 16       | D (606, 62.3%) | N (111, 11.4%) | A ( 58, 6.0%)  | 0.0%  | 73.8%        |
| 17       | K (425, 43.7%) | A (116, 11.9%) | V ( 76, 7.8%)  | 43.7% | 43.7%        |
| 18       | E (321, 33.0%) | A (234, 24.1%) | D (119, 12.2%) | 0.0%  | 45.3%        |
| 19       | A (293, 30.1%) | K (164, 16.9%) | E (124, 12.8%) | 16.9% | 29.6%        |
| 20       | A (768, 79.0%) | V ( 62, 6.4%)  | S ( 33, 3.4%)  | 0.0%  | 3.4%         |
| 21       | Q (178, 18.3%) | E (168, 17.3%) | T (117, 12.0%) | 0.0%  | 47.6%        |
| 22       | E (281, 28.9%) | A (260, 26.7%) | K (110, 11.3%) | 11.3% | 40.2%        |
| 23       | A (471, 48.5%) | L (224, 23.0%) | V ( 42, 4.3%)  | 0.0%  | 0.0%         |
| 24       | L (368, 37.9%) | F (309, 31.8%) | Y (131, 13.5%) | 0.0%  | 13.5%        |
| 25       | K (199, 20.5%) | R (189, 19.4%) | A (106, 10.9%) | 39.9% | 39.9%        |
| 26       | A (223, 22.9%) | E (144, 14.8%) | K (116, 11.9%) | 11.9% | 26.7%        |
| 27       | A (666, 68.5%) | V (106, 10.9%) | M ( 68, 7.0%)  | 0.0%  | 0.0%         |
| 28       | Q (223, 22.9%) | S (147, 15.1%) | V (137, 14.1%) | 0.0%  | 38.1%        |
| 29       | S (309, 31.8%) | P (236, 24.3%) | K (217, 22.3%) | 22.3% | 54.1%        |
| 30       | K (180, 18.5%) | V (144, 14.8%) | E (120, 12.3%) | 18.5% | 30.9%        |
| 31       | L (433, 44.5%) | I (382, 39.3%) | V (111, 11.4%) | 0.0%  | 0.0%         |
| 32       | D (781, 80.3%) | M ( 72, 7.4%)  | H ( 35, 3.6%)  | 0.0%  | 84.0%        |
| 33       | K (482, 49.6%) | R (318, 32.7%) | S ( 49, 5.0%)  | 82.3% | 87.3%        |
| 34       | A (525, 54.0%) | M ( 80, 8.2%)  | L ( 78, 8.0%)  | 0.0%  | 0.0%         |

## Section C

**Table S3.** List of putative TPR homologs identified by sequence and structure analysis. See *Method* section in the article for details.

| pdb_CH | seq_len | score* | P-value* | E-value* | probab* | # rep* | Start:* | pval_rep*       | Pfam**  | TPR_fragment_sequence                 | rmsd***     | prot_name                                     |
|--------|---------|--------|----------|----------|---------|--------|---------|-----------------|---------|---------------------------------------|-------------|-----------------------------------------------|
| 4rg6_A | 560     | 999    | 0.00E+00 | 0.00E+00 | 100.00% | 10     | 235:    | <b>1.20E-07</b> | Pfam_No | GWVLCQIGRAYFELSEYMQAERIFSEVRRRIENYR   | <b>0.68</b> | Cell_division_cycle_protein_27_homolog        |
| 2gw1_A | 514     | 136.9  | 6.30E-42 | 4.30E-37 | 100.00% | 8      | 449:    | <b>6.00E-07</b> | Pfam_No | EQAKIGLAQMKLQQEDIDEAITLFEESADLARTM    | <b>1.44</b> | Mitochondrial_precursor_proteins_import_recep |
| 3zc0_A | 199     | 20.4   | 7.30E-07 | 5.00E-02 | 14.93%  | 1      | 30:     | <b>7.30E-07</b> | Pfam_No | MRIHSTKSIALIHAGKVEEAEQELKKAIELLEKV    | <b>1.86</b> | AFTRAX                                        |
| 2v6y_B | 83      | 20     | 9.60E-07 | 6.50E-02 | 12.60%  | 1      | 11:     | <b>9.60E-07</b> | Pfam_No | ARKYAILAVKADKEGKVDDAITYYKKAIEVLSQI    | -1.00       | AAA_FAMILY_ATPASE,_P60_KATANIN                |
| 2v6y_A | 83      | 19.8   | 1.10E-06 | 7.60E-02 | 11.42%  | 1      | 11:     | <b>1.10E-06</b> | Pfam_No | ARKYAILAVKADKEGKVVEDAITYYKKAIEVLSQI   | <b>1.70</b> | AAA_FAMILY_ATPASE,_P60_KATANIN                |
| 2vkj_A | 106     | 19.5   | 1.30E-06 | 9.00E-02 | 10.30%  | 1      | 53:     | <b>1.30E-06</b> | Pfam_No | ARSLIAEGKDLFETANYGEALVFFFEKALNLSDNE   | <b>1.24</b> | TM1634                                        |
| 2pzi_A | 681     | 26     | 1.40E-08 | 9.90E-04 | 73.93%  | 2      | 467:    | <b>1.80E-06</b> | Pfam_No | WRLVWYRAVAELLTG DYDSATKH FTEVLDTFPGE  | <b>1.01</b> | Probable_serine/threonine-protein_kinase_pknG |
| 4abn_A | 474     | 47.6   | 4.80E-15 | 3.30E-10 | 99.99%  | 2      | 258:    | <b>2.20E-06</b> | Pfam_No | PDLHLNRATLHKYEE SYGEAL EGF SQAAALDPAW | <b>0.46</b> | TETRATRICOPEPTIDE_REPEAT_PROTEIN_5            |
| 3zpj_A | 359     | 24.2   | 5.10E-08 | 3.50E-03 | 53.69%  | 3      | 74:     | <b>6.70E-06</b> | Pfam_No | AVAYSIIASTLAIMEYEEDAMDFFNRAIDEANEI    | <b>1.80</b> | TON_1535                                      |
| 4n5c_A | 802     | 27.1   | 6.80E-09 | 4.60E-04 | 82.85%  | 3      | 93:     | <b>6.90E-06</b> | Pfam_No | KILFNCLGILFFHRGQFQESQRCLLHSLKIHNNT    | <b>1.79</b> | Cargo-transport_protein_YPP1                  |
| 3zn3_A | 291     | 29.4   | 1.40E-09 | 9.40E-05 | 93.72%  | 2      | 156:    | <b>7.50E-06</b> | Pfam_No | PYLLYLSGVVYRK RKQDSKAIDFLKSCVLKAPFF   | <b>0.59</b> | ANAPHASE-PROMOTING_COMPLEX_SUBUNIT_8          |
| 3ly8_A | 372     | 16.5   | 1.10E-05 | 7.50E-01 | 2.40%   | 1      | 310:    | <b>1.10E-05</b> | Pfam_No | WLN YVLLGKVYEMKGMNREAAEAYLTAFNLRPGA   | <b>0.87</b> | Transcriptional_activator_cadC                |
| 4h7x_A | 161     | 16.6   | 1.00E-05 | 7.10E-01 | 2.51%   | 2      | 94:     | <b>1.40E-05</b> | Pfam_No | AFVHISFAQFELSQGNVKKSKQLLQKAVERGAVP    | <b>1.96</b> | Dual_specificity_protein_kinase_TTK           |
| 1e96_B | 203     | 70.6   | 5.70E-22 | 3.90E-17 | 100.00% | 3      | 121:    | <b>1.50E-05</b> | Pfam_No | CEVLYNIAFMYAKKEEWKKAEEQLALATSMKSEP    | <b>1.71</b> | NEUTROPHIL_CYTOSOL_FACTOR_2_(NCF-2)_TPR_DOMAI |
| 2v1s_A | 73      | 15.9   | 1.60E-05 | 1.10E+00 | 1.81%   | 1      | 17:     | <b>1.60E-05</b> | Pfam_No | FLEEIQLGEELLAQGDYEKGVDHLTNAIAVCGQP    | <b>0.94</b> | MITOCHONDRIAL_IMPORT_RECEPTOR_SUBUNIT_TOM20_H |
| 4d10_B | 447     | 30.6   | 6.10E-10 | 4.20E-05 | 96.38%  | 6      | 239:    | <b>1.70E-05</b> | Pfam_No | GVIRECGKMHLREGEFEKAHTDFFFAFKNYDES     | <b>1.60</b> | COP9_SIGNALOSOME_COMPLEX_SUBUNIT_2            |
| 3ax3_A | 73      | 15.9   | 1.70E-05 | 1.10E+00 | 1.78%   | 1      | 17:     | <b>1.70E-05</b> | Pfam_No | FLEEIQLGEELLAQGDYEKGVDHLTNAIAVSGQP    | <b>1.31</b> | Mitochondrial_import_receptor_subunit_TOM20_h |
| 3ly7_A | 372     | 15.7   | 1.90E-05 | 1.30E+00 | 1.59%   | 1      | 310:    | <b>1.90E-05</b> | Pfam_No | WLN YVLLGKVYEMKGMNREAADAYLTAFNLRPGA   | <b>0.88</b> | Transcriptional_activator_cadC                |
| 3kae_A | 242     | 28.1   | 3.40E-09 | 2.30E-04 | 88.84%  | 2      | 208:    | <b>2.60E-05</b> | Pfam_No | SYFISNAARRYFN LGMNDKSKACFELVRRKDPMF   | <b>0.79</b> | Possible_protein_of_nuclear_scaffold          |
| 3ly9_A | 372     | 15.2   | 2.70E-05 | 1.90E+00 | 1.23%   | 1      | 310:    | <b>2.70E-05</b> | Pfam_No | WLN YVLLGKVYEMKGMNREAAANAYLTAFNLRPGA  | <b>0.92</b> | Transcriptional_activator_cadC                |
| 2rpa_A | 78      | 15.1   | 2.90E-05 | 2.00E+00 | 1.18%   | 1      | 12:     | <b>2.90E-05</b> | Pfam_No | IVENVKLAREYALLGN YDSAMVYYQGVLDQM NKY  | <b>1.97</b> | Katanin_p60_ATPase-containing_subunit_A1      |
| 2xpi_A | 597     | 999    | 0.00E+00 | 0.00E+00 | 100.00% | 8      | 305:    | <b>3.20E-05</b> | Pfam_No | SDLL LCKADTLFVRSR FIDVLAITTKILEIDPYN  | <b>0.99</b> | ANAPHASE-PROMOTING_COMPLEX_SUBUNIT_CUT9       |
| 4gkj_T | 99      | 14.1   | 5.50E-05 | 3.80E+00 | 0.73%   | 1      | 26:     | <b>5.50E-05</b> | Pfam_No | IKTLSKKAVQLAQEGKAE EALKIMRKAESLIDKA   | <b>1.70</b> | 30S_ribosomal_protein_S20                     |
| 3kez_A | 461     | 26     | 1.50E-08 | 1.00E-03 | 73.65%  | 2      | 196:    | <b>6.50E-05</b> | Pfam_No | WAAMTLLSRVYLYKGEYNEALTMAENAIKGAEKE    | <b>1.85</b> | Putative_sugar_binding_protein                |
| 4a5x_A | 86      | 13.8   | 6.80E-05 | 4.70E+00 | 0.62%   | 1      | 16:     | <b>6.80E-05</b> | Pfam_No | AATVLKRAVELDSESRYPQALVCYQEGIDLLLQV    | <b>1.59</b> | MIT_DOMAIN-CONTAINING_PROTEIN_1               |
| 4p3e_C | 216     | 13.8   | 6.90E-05 | 4.70E+00 | 0.62%   | 1      | 150:    | <b>6.90E-05</b> | Pfam_No | AYTAYLSGMLRFEHQEWKAAIEAFNKCKTIYEKL    | <b>1.68</b> | Signal_recognition_particle_subunit_SRP68     |
| 4jv5_T | 99      | 13.8   | 7.20E-05 | 4.90E+00 | 0.59%   | 1      | 26:     | <b>7.20E-05</b> | Pfam_No | IKTLSKKAIQLAQEGKAE EALKIMRKAESLIDKA   | <b>1.82</b> | 30S_ribosomal_protein_20                      |
| 1wfd_A | 93      | 13.5   | 8.80E-05 | 6.00E+00 | 0.51%   | 1      | 15:     | <b>8.80E-05</b> | Pfam_No | AVAVLKRAVELDAESRYQ QALVCYQEGIDMLLQV   | <b>1.48</b> | Hypothetical_protein_1500032H18               |
| 2hr2_A | 159     | 43.9   | 6.20E-14 | 4.30E-09 | 99.97%  | 3      | 57:     | <b>8.90E-05</b> | Pfam_No | AFCHAGLAEALAGLRSFDEALHSADKALHYFNRR    | <b>1.50</b> | Hypothetical_protein                          |
| 1zbp_A | 273     | 13.4   | 9.00E-05 | 6.20E+00 | 0.50%   | 1      | 31:     | <b>9.00E-05</b> | Pfam_No | ASLRSSFIELLCIDGDFERADEQLMQSIKLFPEY    | <b>0.93</b> | hypothetical_protein_VPA1032                  |
| 3ox1_A | 428     | 11.1   | 4.60E-04 | 3.10E+01 | 0.13%   | 2      | 370:    | <b>9.50E-05</b> | Pfam_No | GVQVMKV GKLQLHQGMFPQAMKNLR LAFDIMRVT  | <b>1.48</b> | SET_and_MYND_domain-containing_protein_3      |

\* TPRpred output

\*\* Indicates if the fragment belong to Pfam clan TPR (CL0020)

\*\*\* Ca RMSD to an average TPR repeat unit structure (-1 if there are missing residues)

Color scheme:

Solenoid or tandem repeat (font:red5)

MIT (bg:yellow1)

Katanin (bg: yellow2)

TOM20 (bg:green)

RPS20 (bg:cyan)

## Section D

**Table S4.** TPRpred hit list by scanning a merged sequence dataset of *ncbi* and *full* from Pfam family *Ribosomal\_S20p* (PF01649). A per-repeat *P*-value cutoff of 1e-4 is used.

>218294917/8-90(26-59) Len=83 E-prot=2.01e-03 P-rep=5.4e-07  
IKTLSKKAVLLAQEGKAEEAIKIMRKAVSLIDKA  
>53803711/2-84(27-60) Len=83 E-prot=1.72e-02 P-rep=4.6e-06  
LRTYIKKVILAVDSGDLTKAQEAFRQAVPIIDSS  
>315121827/2-84(27-60) Len=83 E-prot=2.18e-02 P-rep=5.8e-06  
VRTFIRANEIAVGVKVEEATEACKKAESLVQKA  
>358448474/2-84(27-60) Len=83 E-prot=2.39e-02 P-rep=6.4e-06  
ARTYVKKIQSKIEAGNYEEAQAAFQQAQPILDSM  
>384439015/9-90(25-58) Len=82 E-prot=3.21e-02 P-rep=8.6e-06  
IKTLSKKAVQLAQEGQAEEAIKILRKAESLIDKA  
>149377785/2-84(27-60) Len=83 E-prot=8.55e-02 P-rep=2.3e-05  
ARTYIKKVQANIEAGKPQEEAQAAALQKAQPIMDSM  
>120553791/2-84(27-60) Len=83 E-prot=1.07e-01 P-rep=2.9e-05  
ARTYMKKVDAAIKAGNHDEAQAAALKEAQIPIMDSM  
>358011912/2-84(27-60) Len=83 E-prot=1.12e-01 P-rep=3.0e-05  
VRTYIKRTVAIAAGDYTEVATDAYKKAVPVIDRM  
>389711173/2-84(27-60) Len=83 E-prot=1.19e-01 P-rep=3.2e-05  
VRTYLKRTVAIAAGDYAVATEAYKKAVPVIDRM  
>71066042/2-84(27-60) Len=83 E-prot=1.20e-01 P-rep=3.2e-05  
VRTYLKRVDAIAAKDYDAATEAYKKAVPVLD RM  
>320451144/9-90(25-58) Len=82 E-prot=1.44e-01 P-rep=3.9e-05  
IKTLSKKAVLLAQEGKAEEALKIMRMAQSLIDKA  
>34811548/2-82(25-58) Len=81 E-prot=1.51e-01 P-rep=4.0e-05  
IKTLSKKAVQLAQEGKAEEALKIMRKAESLIDKA  
>126666692/2-84(27-60) Len=83 E-prot=1.70e-01 P-rep=4.5e-05  
ARTYMKKIHVQIAEGNYEGAKAAFLQAQPILDSM  
>297565393/9-90(25-58) Len=82 E-prot=1.81e-01 P-rep=4.8e-05  
IKTISKKAVALAQEGNTEETKFLRLAESLIDKA  
>295698740/2-81(24-57) Len=80 E-prot=1.86e-01 P-rep=5.0e-05  
IKTFTKRVLSFLSNKDIEQAKYFNRVQSILDRF  
>224510696/2-82(25-58) Len=81 E-prot=1.97e-01 P-rep=5.3e-05  
IKTLSKKAIQLAQEGKAEEALKIMRKAESLIDKA  
>254429490/2-61(4-37) Len=60 E-prot=2.14e-01 P-rep=5.7e-05  
VRTYLKKVNAAIASGDQGSQAQAYNQAVSVL DKA  
>255318942/2-84(27-60) Len=83 E-prot=2.27e-01 P-rep=6.1e-05  
VRTYIKRTLSAIAAGDYAVATEAYKKAVPVIDRM  
>83648579/2-84(27-60) Len=83 E-prot=2.56e-01 P-rep=6.8e-05  
VRTYIKKVSAQIEQGSYDGATQALTTAAPIIDSM  
>148652754/2-84(27-60) Len=83 E-prot=2.58e-01 P-rep=6.9e-05  
IRTYIKKVDAAILAGDYDAATAAYNKAVPVIDRM  
>160872516/4-85(27-60) Len=82 E-prot=2.60e-01 P-rep=7.0e-05  
MRTYIKRVVVAIEAGEATKAKDAYQTALPIIDRM  
>50084567/2-84(27-60) Len=83 E-prot=2.93e-01 P-rep=7.8e-05  
VRTYIKRTVNIAAAGDYTEVATEAYKKAVPVIDRM  
>333367735/2-84(27-60) Len=83 E-prot=2.95e-01 P-rep=7.9e-05  
IRTYIKKVDAAILAGDYEATAAYNKAVPVIDRM  
>126641662/2-84(27-60) Len=83 E-prot=3.56e-01 P-rep=9.5e-05  
VRTYIKRTLSAIAAGDYAVATEAYKKAVPVIDRM

## Section E

**Table S5.** The mutation combinations tested *in silico*.

K7 was found to co-evolve with I23 (see article). Therefore, they were considered to be a single mutation and was mutated together. I23 was also mutated independently because K7\_I23D is physiochemically similar to K7R\_I23D.

- 1) Primary mutations are defined to be mutations introduced following the principle of census design.
- 2) Secondary mutations are defined to be mutations introduced to lower protein pI values.

|                                                                         |                                                                                                                                                                                                                                                                                                                                                                                                                                                                                                     |                                                                                     |
|-------------------------------------------------------------------------|-----------------------------------------------------------------------------------------------------------------------------------------------------------------------------------------------------------------------------------------------------------------------------------------------------------------------------------------------------------------------------------------------------------------------------------------------------------------------------------------------------|-------------------------------------------------------------------------------------|
| Primary mutations <sup>1)</sup>                                         | L4W, K7L_I23Y, K7R_I23D, V9N, I23D                                                                                                                                                                                                                                                                                                                                                                                                                                                                  |                                                                                     |
| Secondary mutations <sup>2)</sup>                                       | K2E, K6N, K22E, R25E, R25Q                                                                                                                                                                                                                                                                                                                                                                                                                                                                          |                                                                                     |
| All combinations of primary mutations (15)                              | Single (5):                                                                                                                                                                                                                                                                                                                                                                                                                                                                                         | L4W, K7L_I23Y, K7R_I23D, V9N, I23D                                                  |
|                                                                         | Double (7):                                                                                                                                                                                                                                                                                                                                                                                                                                                                                         | L4W_K7L_I23Y, L4W_V9N, L4W_I23D, L4W_K7R_I23D, K7L_V9N_I23Y, V9N_I23D, K7R_V9N_I23D |
|                                                                         | Triple (3):                                                                                                                                                                                                                                                                                                                                                                                                                                                                                         | L4W_K7L_V9N_I23Y, L4W_V9N_I23D, L4W_K7R_V9N_I23D                                    |
| Tested combinations involving both primary and secondary mutations (25) | K2E_K7L_I23Y, K6N_K7L_I23Y, K7L_K22E_I23Y, K7L_I23Y_R25Q, K7L_I23Y_R25E, K2E_K7L_V9N_I23Y, K6N_K7L_V9N_I23Y, K7L_V9N_K22E_I23Y, K7L_V9N_I23Y_R25Q, K7L_V9N_I23Y_R25E, K2E_L4W_K7L_V9N_I23Y, L4W_K6N_K7L_V9N_I23Y, L4W_K7L_V9N_K22E_I23Y, L4W_K7L_V9N_I23Y_R25Q, L4W_K7L_V9N_I23Y_R25E, K2E_K7R_V9N_I23D, K6N_K7R_V9N_I23D, K7R_V9N_K22E_I23D, K7R_V9N_I23D_R25Q, K7R_V9N_I23D_R25E, K2E_L4W_K7R_V9N_I23D, L4W_K6N_K7R_V9N_I23D, L4W_K7R_V9N_K22E_I23D, L4W_K7R_V9N_I23D_R25Q, L4W_K7R_V9N_I23D_R25E |                                                                                     |

The fixbb command line:

```
fixbb.linuxgccrelease -s input_pdb -use_input_sc -resfile resfile_mut -ex1 -ex2 -minimize_sidechains -ndruns 10 -nstruct 1000
```

The relax command line:

```
relax.linuxgccrelease -relax:fast -ex1 -ex2 -ndruns 10 -nstruct 10000
```

## Section F

**Table S6.** Biophysical parameters of designed TPR repeats. Folded proteins yielding a non-cooperative thermal melting curve are marked by an asterisk (\*). Urea denaturation parameters are  $\Delta G_{U-F}^{H_2O}$ , the free energy change in the absence of denaturant;  $C_m$ , the urea concentration at the curve midpoint; and  $m_{U-F}$ , the sensitivity of the transition to denaturant.

|            | Circular dichroism                          |          | Urea denaturation                                 |                                                     |         | Static light scattering |                   |                |
|------------|---------------------------------------------|----------|---------------------------------------------------|-----------------------------------------------------|---------|-------------------------|-------------------|----------------|
|            | $\alpha$ -helical<br>$\lambda_{min}$ 222 nm | $T_m$ °C | $\Delta G_{U-F}^{H_2O}$<br>kcal·mol <sup>-1</sup> | $m_{U-F}$<br>kcal·mol <sup>-1</sup> M <sup>-1</sup> | $C_m$ M | Calculated MW<br>kDa    | Monomer MW<br>kDa | Folded protein |
| M0         | -                                           | -        | -                                                 | -                                                   | -       | 16.4                    | 14.4              | -              |
| M2         | +                                           | -*       | 4.38 ± 0.19                                       | 1.25 ± 0.05                                         | 3.50    | 27.4                    | 14.5              | +              |
| M4E        | +                                           | -*       | 7.87 ± 0.29                                       | 1.38 ± 0.05                                         | 5.67    | 31.0                    | 14.6              | +              |
| M4N        | +                                           | 77       | 5.78 ± 0.13                                       | 1.36 ± 0.03                                         | 4.27    | 20.9                    | 14.5              | +              |
| M4NΔC      | +                                           | 78       | 5.43 ± 0.14                                       | 1.22 ± 0.03                                         | 4.46    | 20.1                    | 11.9              | +              |
| M4N-His    | +                                           | 75       | 4.80 ± 0.21                                       | 1.15 ± 0.05                                         | 4.17    | 28.7                    | 15.4              | +              |
| M4RD       | -                                           | -        | -                                                 | -                                                   | -       | 15.3                    | 14.4              | -              |
| M5         | +                                           | -*       | 2.81 ± 0.07                                       | 0.81 ± 0.06                                         | 3.49    | 27.8                    | 14.5              | +              |
| Rps20 T.a. | -                                           | -        | -                                                 | -                                                   | -       | 9.8                     | 10.8              | ±              |
| Rps20 T.t. | -                                           | -        | -                                                 | -                                                   | -       | 9.9                     | 11.7              | ±              |

## **Section G**

**Table S7.** The primary structures of polypeptide chains in the ASUs of M4N (three chains) and the two crystal forms of M4NΔC: M4NΔC CF I (four chains) and M4NΔC CF II (one chain).

>M4N chain A

NS

IKTLSNLANLLAQEGKAEAAIKYMRKAVSLDPNN

IKTLSNLANLLAQEGKAEAAIKYMRKAVSLDPNN

IKTLSNLAVLLAQEGKAEAAIKYMRKAVSLIDKA

AK

>M4N chain B

NS

IKTLSNLANLLAQEGKAEAAIKYMRKAVSLDPNN

IKTLSNLANLLAQEGKAEAAIKYMRKAVSLDPNN

IKTLSNLAVLLAQEGKAEAAIKYMRKAVSLIDKA

A

>M4N chain C

GNS

IKTLSNLANLLAQEGKAEAAIKYMRKAVSLDPNN

IKTLSNLANLLAQEGKAEAAIKYMRKAVSLDPNN

IKTLSNLAVLLAQEGKAEAAIKYMRKAVSLIDKA

AK

>M4NΔC CF I chain A

NS

IKTLSNLANLLAQEGKAEAAIKYMRKAVSLDPNN

IKTLSNLANLLAQEGKAEAAIKYMRKAVSLDPNN

IKTLSNLAVLLAQEGKAEAAIKYMRKAVSLIDKA

AKG

>M4NΔC CF I chain B

NS

IKTLSNLANLLAQEGKAEAAIKYMRKAVSLDPNN

IKTLSNLANLLAQEGKAEAAIKYMRKAVSLDPNN

IKTLSNLAVLLAQEGKAEAAIKYMRKAVSLIDKA

A

>M4NΔC CF I chain C

NS

IKTLSNLANLLAQEGKAEAAIKYMRKAVSLDPNN

IKTLSNLANLLAQEGKAEAAIKYMRKAVSLDPNN

IKTLSNLAVLLAQEGKAEAAIKYMRKAVSLIDKA

AKG

>M4NΔC CF I chain D

NS

IKTLSNLANLLAQEGKAEAAIKYMRKAVSLDPNN

IKTLSNLANLLAQEGKAEAAIKYMRKAVSLDPNN

IKTLSNLAVLLAQEGKAEAAIKYMRKAVSLIDKA

A

>M4NΔC CF II chain A

NS

IKTLSNLANLLAQGGKAEAAIKYMRKAVSLDPNN

IKTLSNLANLLAQEGKAEAAIKYMRKAVSLDPNN

IKTLSNLAVLLAQEGKAEAAIKYMRKAVSLIDKA

AKG

## Section H

**Table S8.** Crystallization and cryo conditions.

| Structure   | Reservoir solution (RS)              | Cryo solution     |
|-------------|--------------------------------------|-------------------|
| M4N         | 200 mM lithium sulfate; 20% PEG 3350 | RS + 20% PEG 400  |
| M4NΔC CF I  | 100 mM Tris HCl pH 8.5; 30% PEG 400  | -                 |
| M4NΔC CF II | 100 mM SPG(*) pH 8; 25% PEG 1500     | RS + 15% glycerol |

(\*) SPG Buffer as formulated in the QUIAGEN PACT screen.

**Table S9.** Data collection and refinement statistics

|                                            | M4N                          |                                             | M4NΔC                                           |                              |
|--------------------------------------------|------------------------------|---------------------------------------------|-------------------------------------------------|------------------------------|
|                                            | Native                       | K <sub>2</sub> PtCl <sub>4</sub> derivative | Native, CF I                                    | Native, CF II                |
| Wavelength (Å)                             | 1.0                          | 1.071                                       | 1.071                                           | 1.0                          |
| Space group                                | P3 <sub>1</sub> 21           | P3 <sub>1</sub> 21                          | P2 <sub>1</sub>                                 | P622                         |
| Cell dimensions                            | a=b=92.23 Å,<br>c=76.41 Å    | a=b=94.39 Å,<br>c=76.51 Å                   | a=49.08 Å, b=50.31 Å,<br>c=83.10 Å,<br>β=102.4° | a=b=64.75 Å,<br>c=86.83 Å    |
| Monomers / ASU                             | 3                            | 3                                           | 4                                               | 1                            |
| Resolution (Å)                             | 35.4 - 2.15<br>(2.28 – 2.15) | 36.1 - 2.50<br>(2.66 – 2.50)                | 38.3 - 2.05<br>(2.17 - 2.05)                    | 34.3 - 1.65<br>(1.75 - 1.65) |
| Completeness (%)                           | 98.6 (97.4)                  | 98.6 (95.0)                                 | 98.4 (94.1)                                     | 99.6 (99.0)                  |
| Redundancy                                 | 4.38 (4.13)                  | 13.9 (13.9)                                 | 5.58 (5.69)                                     | 9.21 (9.44)                  |
| I/σ(I)                                     | 15.51 (2.54)                 | 19.32 (3.40)                                | 18.4 (2.10)                                     | 32.6 (3.28)                  |
| R <sub>merge</sub> (%)                     | 6.5 (69.7)                   | 10.6 (94.1)                                 | 5.5 (70.8)                                      | 3.9 (71.3)                   |
| R <sub>cryst</sub> / R <sub>free</sub> (%) | 22.7 / 26.4                  |                                             | 21.8 / 26.5                                     | 19.8 / 21.9                  |
| RMSD Bond angles/lengths                   | 0.797/0.005                  |                                             | 0.811/0.005                                     | 0.967/0.007                  |
| Ramachandran plot statistics (%)           | 94.3 / 5.7 / 0               |                                             | 94.4 / 5.6 / 0                                  | 95 / 5 / 0                   |
| PDB code                                   | 5FZQ                         |                                             | 5FZR                                            | 5FZS                         |

Values in parentheses refer to the highest resolution shell. The Ramachandran plot statistics show the percentage of residues in the most favored / additionally allowed / other regions, respectively, as defined and determined using the program PROCHECK.

## Section I

**Table S10.** RMSD between the three polypeptide chains in the ASU of M4N (PDB id: 5fzq) after superposition. Numbers of atoms considered for the superposition and calculation of RMSD are given in parentheses. There are 105 residues in common among the three chains (residues 1-105). Three RMSD values are calculated for each pair of chains: all atoms (variable numbers of atoms) / C $\alpha$  of all common residues (105 atoms) / C $\alpha$  of the three TPR units (102 atoms).

|         | Chain A                              | Chain B                              |
|---------|--------------------------------------|--------------------------------------|
| Chain B | 1.64 (771) / 1.29 (105) / 1.30 (102) | -                                    |
| Chain C | 1.28 (738) / 0.93 (105) / 0.88 (102) | 1.61 (729) / 1.35 (105) / 1.32 (102) |

**Table S11.** C $\alpha$  RMSD between M4N (PDB id: 5fzq) and CTPR3 (PDB: 1na0, chain A) after superposition. Numbers of atoms considered for the superposition and calculation of RMSD are given in parentheses. Only the first two TPR units and the first 30 residues of the third TPR units are considered ( 34 + 34 + 30 = 98 residues ).

|                | M4N_A     | M4N_B     | M4N_C     |
|----------------|-----------|-----------|-----------|
| CTPR3 (1na0_A) | 2.57 (98) | 1.93 (98) | 2.33 (98) |

**Table S12.** C $\alpha$  RMSD between M4N $\Delta$ C CF I (crystal form with four chains in the ASU, PDB id: 5fzr) and CTPR3 after superposition. Numbers of atoms considered for the superposition and calculation of RMSD are given in parentheses.

|                       | M4N $\Delta$ C CF I_A | M4N $\Delta$ C CF I_B | M4N $\Delta$ C CF I_C | M4N $\Delta$ C CF I_D |
|-----------------------|-----------------------|-----------------------|-----------------------|-----------------------|
| CTPR3 (1na0_A)        | 2.72 (98)             | 1.95 (98)             | 2.69 (98)             | 2.11 (98)             |
| M4N $\Delta$ C CF I_B | 1.21 (102)            | -                     | -                     | -                     |
| M4N $\Delta$ C CF I_C | 0.44 (102)            | 1.10 (102)            | -                     | -                     |
| M4N $\Delta$ C CF I_D | 1.13 (102)            | 0.41 (102)            | 1.00 (102)            | -                     |

**Table S13.** C $\alpha$  RMSD between M4N $\Delta$ C CF II (crystal form with only one chain in the ASU, PDB id: 5fzs) and CTPR3 after superposition. Numbers of atoms considered for the superposition and calculation of RMSD are given in parentheses.

|                | M4N $\Delta$ C CF II_A |
|----------------|------------------------|
| CTPR3 (1na0_A) | 2.72 (98)              |

**Table S14.** C $\alpha$  RMSD between dimeric complexes in M4N, M4N $\Delta$ C CF I and M4N $\Delta$ C CF II. Numbers of atoms considered for the superposition and calculation of RMSD are given in parentheses.

|                        | M4N $\Delta$ C CF I_AB | M4N $\Delta$ C CF I_CD | M4N $\Delta$ C CF II_AB |
|------------------------|------------------------|------------------------|-------------------------|
| M4N                    | 0.59 (204)             | 0.78 (204)             | 1.82 (204)              |
| M4N $\Delta$ C CF I_AB | -                      | 0.55 (204)             | 1.81 (204)              |
| M4N $\Delta$ C CF I_CD | -                      | -                      | 1.63 (204)              |

**Table S15.** RMSD between the three TPR units in the three chains of M4N (PDB: 5fzq). Numbers of atoms considered for the superposition and calculation of RMSD are given in parentheses. Only the first 30 residues in the third TPR unit are considered.

| <b>M4N_A</b>      | <b>TPR unit 1</b>      | <b>TPR unit 2</b>      |
|-------------------|------------------------|------------------------|
| <b>TPR unit 2</b> | 1.15 (257) / 0.42 (34) | -                      |
| <b>TPR unit 3</b> | 1.00 (218) / 0.40 (30) | 0.87 (214) / 0.31 (30) |

| <b>M4N_B</b>      | <b>TPR unit 1</b>      | <b>TPR unit 2</b>      |
|-------------------|------------------------|------------------------|
| <b>TPR unit 2</b> | 1.27 (250) / 0.59 (34) | -                      |
| <b>TPR unit 3</b> | 1.18 (210) / 0.43 (30) | 0.90 (221) / 0.35 (30) |

| <b>M4N_C</b>      | <b>TPR unit 1</b>      | <b>TPR unit 2</b>      |
|-------------------|------------------------|------------------------|
| <b>TPR unit 2</b> | 0.97 (231) / 0.65 (34) | -                      |
| <b>TPR unit 3</b> | 0.99 (206) / 0.66 (30) | 0.82 (195) / 0.31 (30) |

## Section J

**Table S16.** SEG prediction results of low-complexity regions in the ribosomal protein S20 of *Thermus aquaticus* (NCBI ACCESSION: WP\_003044315.1; GI: 489134531). The helical hairpin RPS20-hhta is underlined (residue 33-66).

| SEG parameters                          | SEG output                                                                                                                          |                                                                                                                                |
|-----------------------------------------|-------------------------------------------------------------------------------------------------------------------------------------|--------------------------------------------------------------------------------------------------------------------------------|
|                                         | Low-complexity segments                                                                                                             | High-complexity segments                                                                                                       |
| -window 12<br>-locut 2.2<br>-hicut 2.5  |                                                                                                                                     | 1-97 MATKKPKKNLSALKRHRQSLKRRLRNKAKKSA <u>IKT</u><br><u>LSKKAVLLAQEGKAEAAIKIMRKAVSLIDKAAKGS</u><br>TLHKNAAAARRKSRLMRKVQKLLSAVSA |
| -window 25<br>-locut 3.0<br>-hicut 3.3  | kkpkknlsalkrhrqslkrllrnkakksa <u>ikt</u> l <u>sk</u><br><u>kavllagegkaeeai</u> kimrkavsl                                            | 1-3 MAT<br>4-62<br>63-97 <u>IDKAA</u> KGSTLHKNAAAARRKSRLMRKVQKLLSAVSA                                                          |
| -window 45<br>-locut 3.4<br>-hicut 3.75 | matkkpkknlsalkrhrqslkrllrnkakksa <u>ikt</u><br><u>lskkavllagegkaeeai</u> kimrkavsl <u>idka</u> akgs<br>tlhknaaaarrksrlmrkvqkllsavsa | 1-97                                                                                                                           |
